# Supplementary material for: Identification of five genetic variants as novel determinants of type 2 diabetes mellitus in Japanese by exome-wide association studies
Source: PubMed Central journal article supplement (PMC5655215; doi:10.18632/oncotarget.19287), 2017-07-17
Supplement: oncotarget-08-80492-s001.pdf [file oncotarget-08-80492-s001.pdf]

# Identification of five genetic variants as novel determinants of type 2 diabetes mellitus in Japanese by exome-wide association studies

## SUPPLEMENTARY MATERIALS

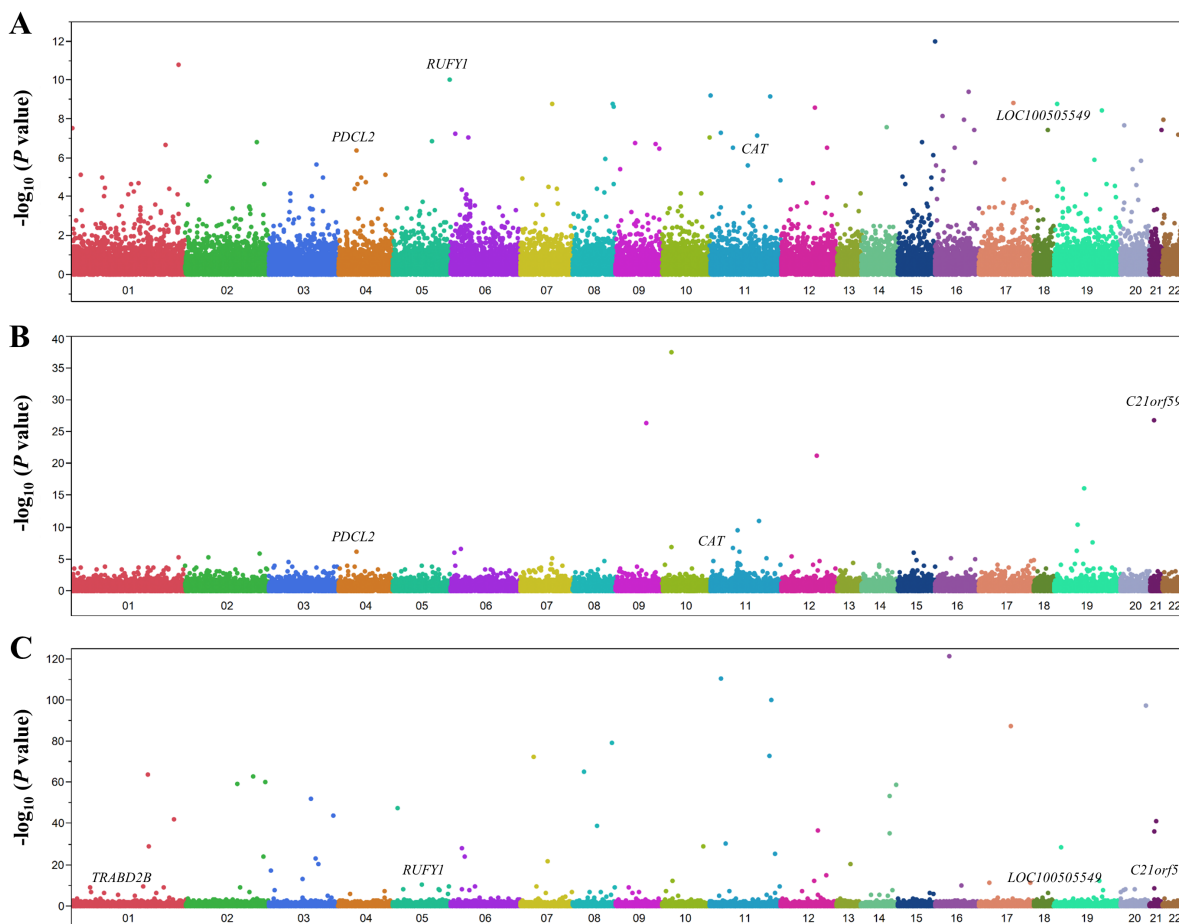

**Supplementary Figure 1:** Manhattan plots for  $P$  values in the EWASs of FPG level (A), blood HbA<sub>1c</sub> content (B), and type 2 DM (C). The  $P$  values ( $y$ -axis) are plotted as  $-\log_{10}(P)$  with respect to the physical chromosomal position of the corresponding SNPs ( $x$ -axis). The genes found to be associated with both FPG level and either blood HbA<sub>1c</sub> content or type 2 DM are indicated in (A), those associated with both blood HbA<sub>1c</sub> content and either FPG level or type 2 DM are indicated in (B), and those associated with type 2 DM are indicated in (C).

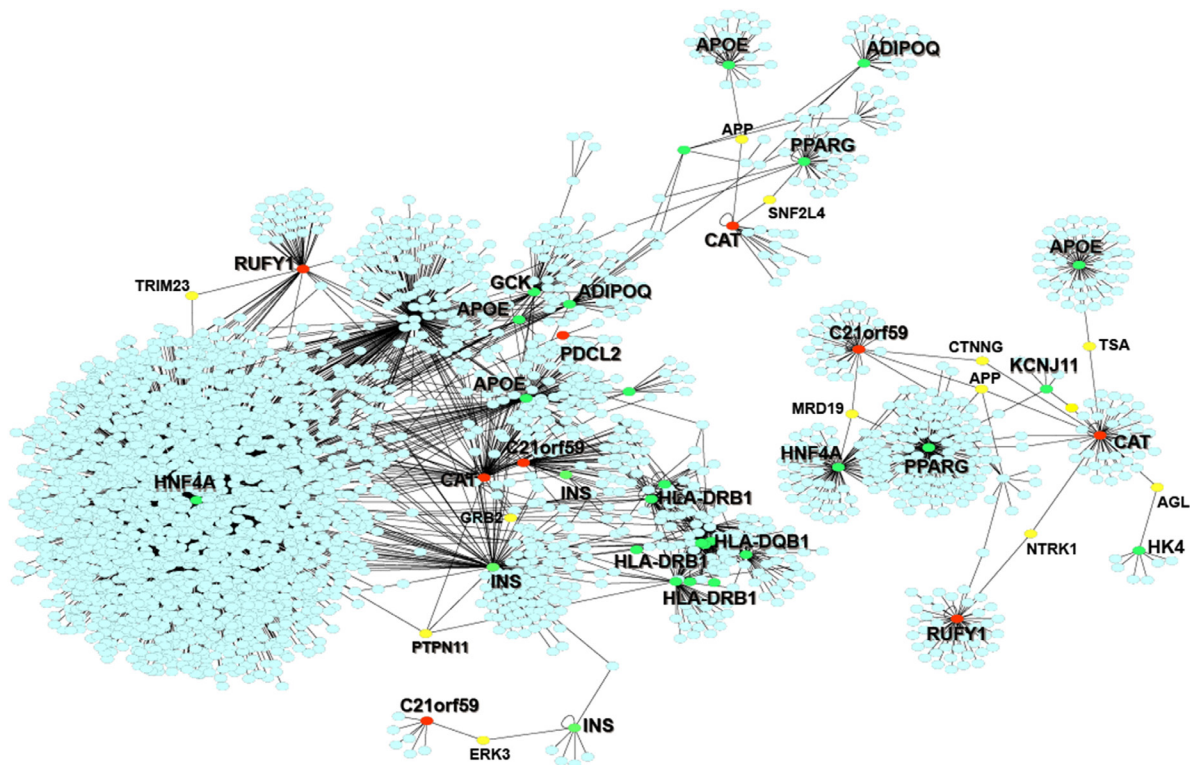

**Supplementary Figure 2:** The network of putative interactions among molecules related to the top ten (high scores) genes that have been shown to be associated with type 2 DM (closed green circle) selected from DisGeNET database (<http://www.disgenet.org/web/DisGeNET>) and four genes (*CAT*, *PDCL2*, *RUFY1*, and *C21orf59*) identified in the present study (closed red circle) examined by Cytoscape version 3.4.0 software (<http://www.cytoscape.org/>). Molecules shown in closed yellow circle represent putative mediators of interactions between those genes. The network was automatically integrated based on human molecular interaction data from different public databases.

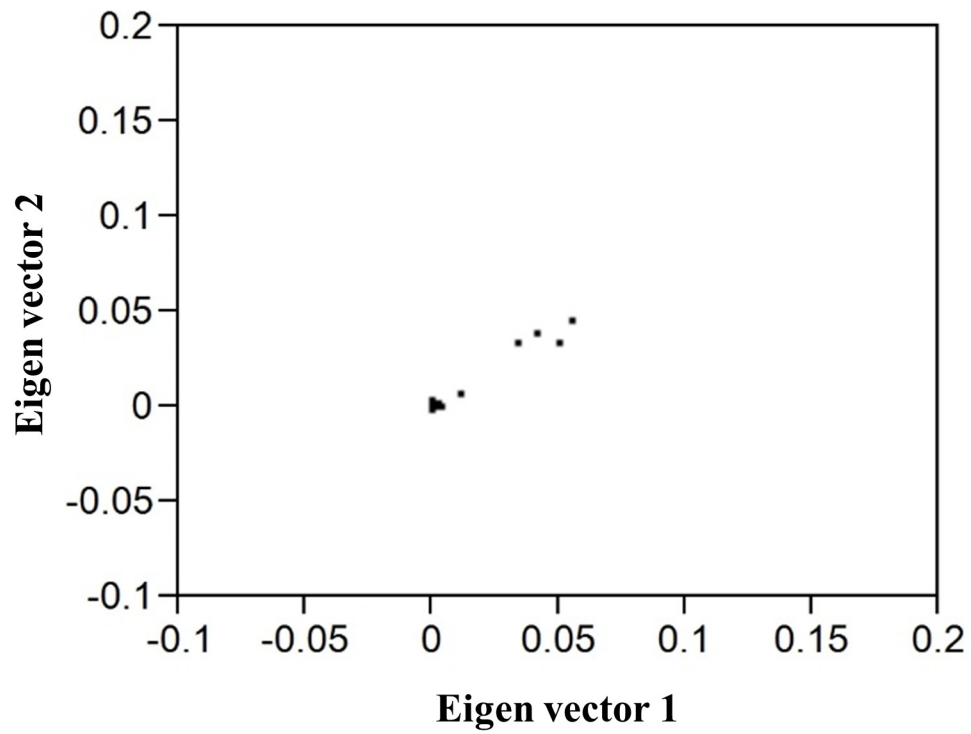

**Supplementary Figure 3: Distribution of samples examined by principal components analysis for population stratification in the EWASs for type 2 DM.** The analysis was performed with the EIGENSTRAT method, with the samples being plotted according to the first (horizontal axis) and second (vertical axis) principal components.

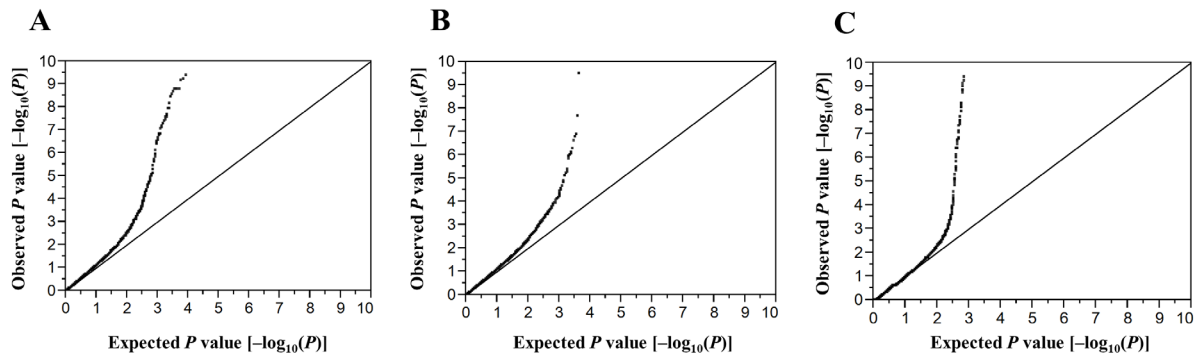

**Supplementary Figure 4:** Quantile-quantile plots for  $P$  values of genotypes in the EWASs for FPG level (A) or blood HbA<sub>1c</sub> content (B) or for those of allele frequencies in the EWAS for type 2 DM (C). The observed  $P$  values ( $y$ -axis) were compared with the expected  $P$  values ( $x$ -axis) under the null hypothesis, with the values being plotted as  $-\log_{10}(P)$ .

**Supplementary Table 1: The 87 SNPs significantly ( $P < 1.21 \times 10^{-6}$ ) associated with type 2 DM in the EWAS**

See Supplementary File 1

**Supplementary Table 2: Genotype distributions for SNPs associated ( $P < 1.21 \times 10^{-6}$ ) with type 2 DM in the EWAS**

See Supplementary File 1

**Supplementary Table 3: Relation of SNPs to type 2 DM as determined by multivariable logistic regression analysis**

See Supplementary File 1

**Supplementary Table 4: Relation of genes, chromosomal loci, and SNPs identified in the present study to phenotypes previously examined in GWASs**

See Supplementary File 1

**Supplementary Table 5: Minor allele frequencies and effect sizes of the 56 SNPs identified in the present study**

See Supplementary File 1
